# Supplementary material for: Myo-Inositol Transporter SLC5A3 Associates with Degenerative Changes and Inflammation in Sporadic Inclusion Body Myositis
Source: PubMed Central journal article supplement (PMC7226596; doi:10.3390/biom10040521), 2020-03-30
Supplement: biomolecules-10-00521-s001.pdf [file biomolecules-10-00521-s001.pdf]

**Supplementary Figure S1.**

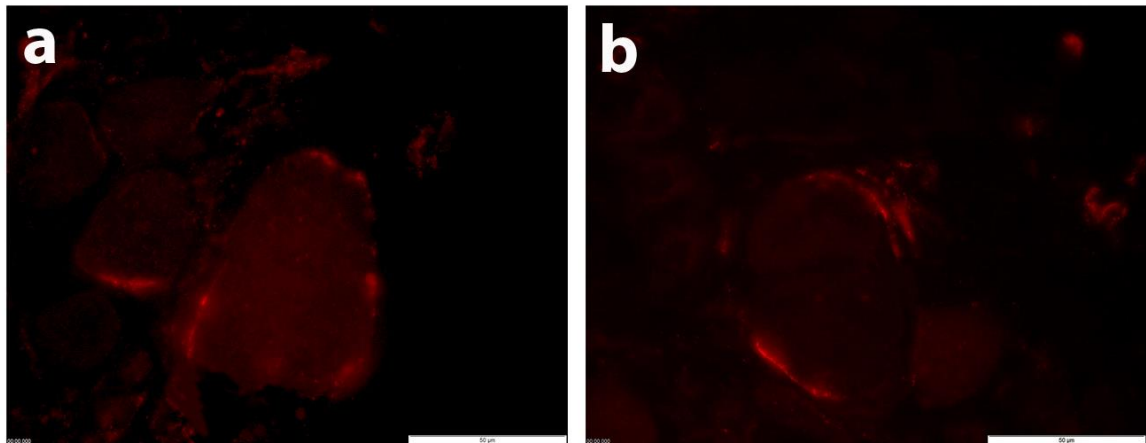

Immunofluorescence for SLC5A11 (CY3, red) presents as similar discontinuous membrane staining on muscle fibers in skeletal muscle tissue from a normal control (a) and from sporadic inclusion body myositis patient IBM9 (b). Scale bars 50 $\mu$ M.
